# Supplementary material for: Reverse transcription-free digital-quantitative-PCR for microRNA analysis
Source: Royal Society of Chemistry journal article supplement (doi:10.1039/d3an00351e), 2023-01-01
Supplement: d3an00351e1.pdf [file d3an00351e1.pdf]

## **SUPPLEMENTARY INFORMATION**

### **Reverse Transcription-Free Digital-Quantitative-PCR for microRNA Analysis**

Hao T. Mai, Brice C. Vanness, and Thomas H. Linz\*

Department of Chemistry, Wayne State University

\*Corresponding Author

Dr. Thomas H. Linz

Department of Chemistry

Wayne State University

5101 Cass Ave, Detroit, MI 48202

Email: [tlinz@wayne.edu](mailto:tlinz@wayne.edu)

Phone: 313-577-2580

**Table S1.** Nucleic acid sequences used in base-stacking PCR.

| Reagent        | Sequence (5'-3')                                                                                         |
|----------------|----------------------------------------------------------------------------------------------------------|
| DNA Guide      | Biotin-GGCTAAGACAGATGCTCTTTGCCAACAGGCCACAGAA<br>TTCCTACACTCAAAGTCGTACTGAACTATACAACCTACTACCT<br>CATCGCACT |
| let-7a miRNA   | UGAGGUAGUAGGUUGUAUAGUU                                                                                   |
| Forward Primer | TACGAGAGATGCGA                                                                                           |
| Reverse Primer | GGCTAAGACAGATGCTC                                                                                        |

**Table S2.** Reagents used in the PCR master mixes and the microfluidic device loading buffer.

| Reagent                               | Components         | Concentration |
|---------------------------------------|--------------------|---------------|
| Microfluidic<br>dqPCR<br>master mix   | KAPA SYBR Fast mix | 1x            |
|                                       | SYBR Green         | 5x            |
|                                       | MgCl <sub>2</sub>  | 2 mM          |
|                                       | Primers            | 6 µM          |
|                                       | Kapa 2G Polymerase | 0.15 U/µL     |
| Bulk commercial<br>qPCR<br>master mix | KAPA SYBR Fast mix | 1x            |
|                                       | Rox Reference Dye  | 100 nM        |
|                                       | DNA Guide          | 200 nM        |
|                                       | Primers            | 200 nM        |
| Loading buffer                        | Tris HCl, pH 8     | 20 mM         |
|                                       | KCl                | 20 mM         |
|                                       | MgCl <sub>2</sub>  | 2.5 mM        |
|                                       | Tween 20           | 0.1%          |
|                                       | BSA in 1x TBS      | 1%            |

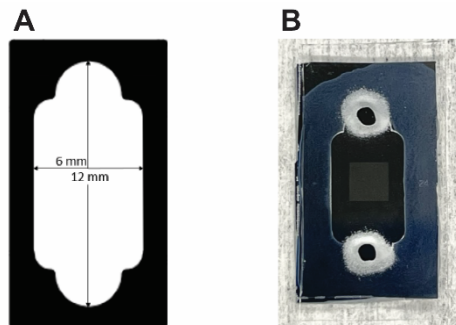

**Figure S1.** (A) Illustration of a glass fluidic dome feature. (B) Image of an assembled silicon-glass microwell array device. The total volume of the device is 1.5  $\mu\text{L}$ .

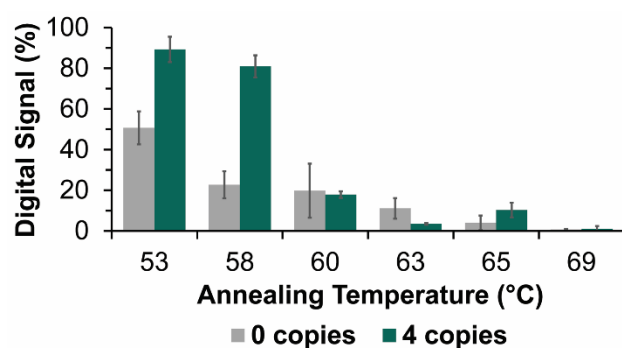

**Figure S2.** PCR annealing temperature was evaluated by measuring the digital assay signal using 300,000 guides/bead. Negative controls decreased in signal uniformly with increasing temperature, whereas positive controls experienced a sharp decrease at 60 °C.

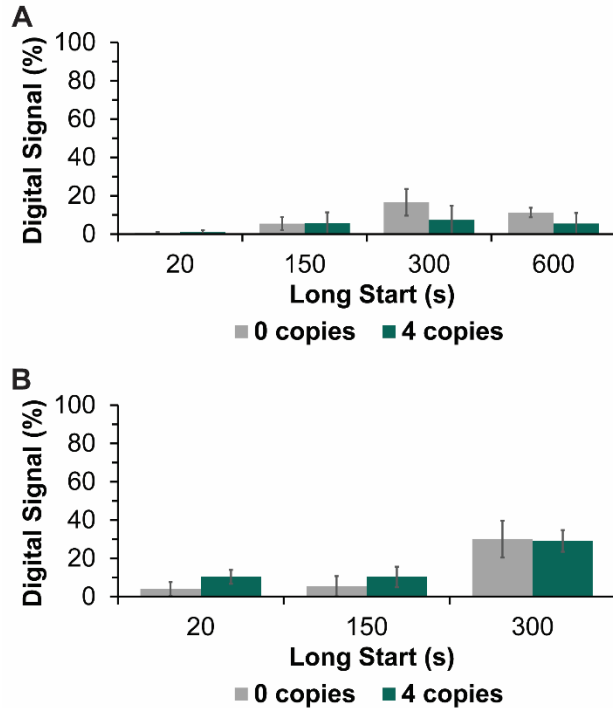

**Figure S3.** The Cycle 1 annealing time was evaluated to determine its effect on the digital signal of a BS-PCR assay. Long-start programs using annealing temperatures of **(A)** 69 °C and **(B)** 65 °C produced similar results between both positive and negative controls at each condition. Annealing for Cycles 2-35 was done for 20 s at the same annealing temperature as Cycle 1.

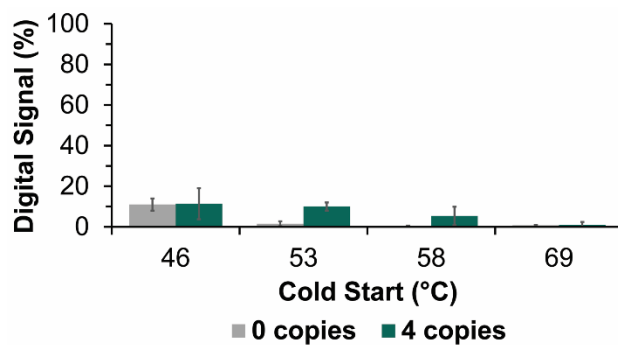

**Figure S4.** The Cycle 1 annealing temperature was evaluated to determine its effect on the digital signal of a BS-PCR assay. Cold-start programs exhibited a gradual decrease in digital signal from positive controls as temperature increased, while negative controls decreased sharply between 46 °C and 53 °C. An annealing temperature of 69 °C was used for Cycles 2-35.

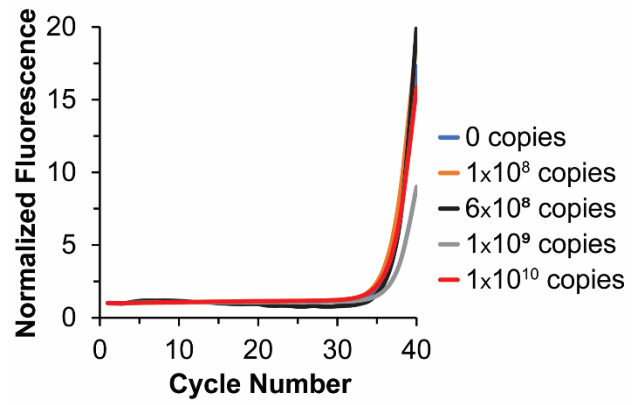

**Figure S5.** Averaged qPCR curves obtained from a commercial qPCR instrument. The copy numbers of let-7a did not affect the measured  $C_q$  values.
